# Supplementary material for: Preparation of inorganic molten salt composite phase change materials and study on their electrothermal conversion properties
Source: Royal Society of Chemistry journal article supplement (doi:10.1039/d4im00009a), 2024-01-01
Supplement: d4im00009a7.pdf [file d4im00009a7.pdf]

## Supplementary Information

### Preparation of inorganic molten salt composite phase change materials and study on their electrothermal conversion properties

Jiandong Zuo,<sup>a</sup> Hongjie Luo,<sup>a</sup> Ziye Ling,<sup>\*ab</sup> Zhengguo Zhang,<sup>\*ab</sup> Xiaoming  
Fang<sup>ab</sup> and Weiwei Zhang<sup>c</sup>

<sup>a</sup> Key Laboratory of Enhanced Heat Transfer and Energy Conservation, The Ministry  
of Education, School of Chemistry and Chemical Engineering, South China  
University of Technology, Guangzhou 510640, China

<sup>b</sup> Guangdong Engineering Technology Research Center of Efficient Heat Storage and  
Application, South China University of Technology, Guangzhou 510640, China

<sup>c</sup> Gmerit Holdings Ltd., Foshan 528000, China

\* Corresponding author, e-mail: [zyling@scut.edu.cn](mailto:zyling@scut.edu.cn), [cezhang@scut.edu.cn](mailto:cezhang@scut.edu.cn)

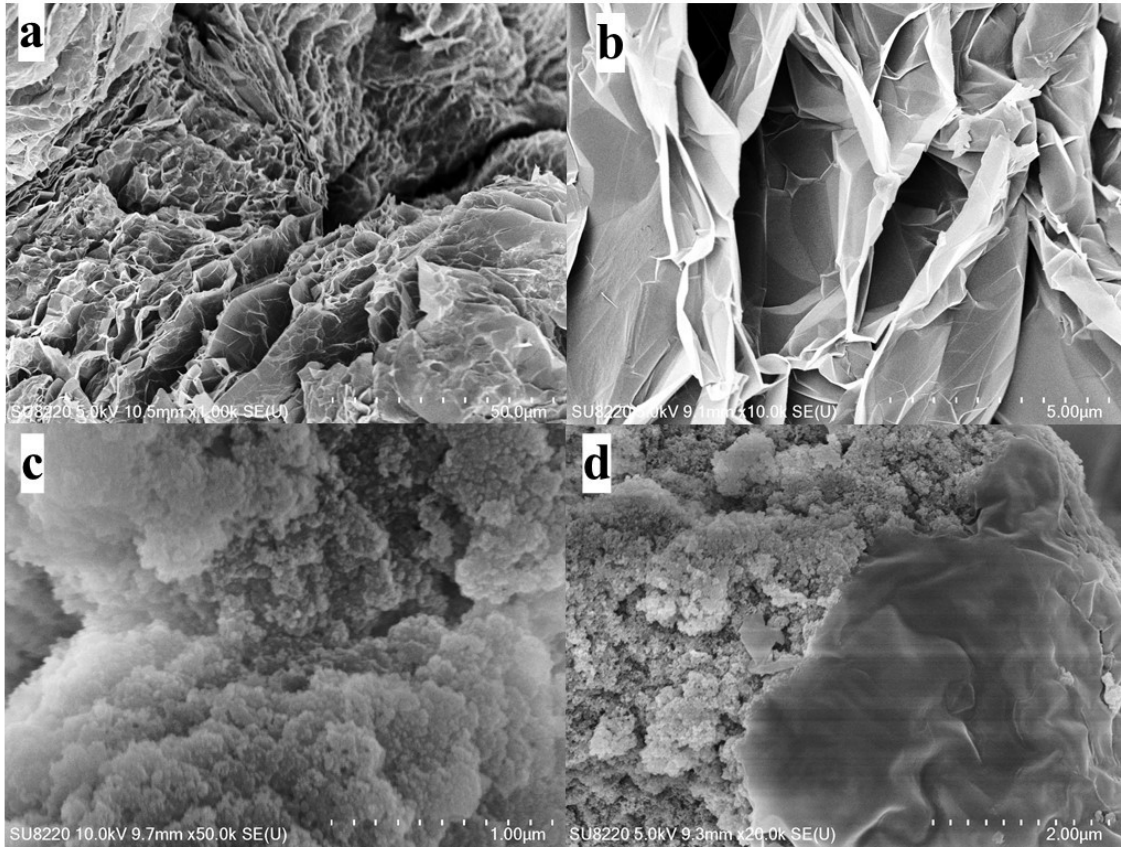

**Fig. S1** The micromorphology of each substance. (a, b) EG; (c) LiNO<sub>3</sub>-KCl/SiO<sub>2</sub>; (d) LiNO<sub>3</sub>-KCl/SiO<sub>2</sub>/EG.

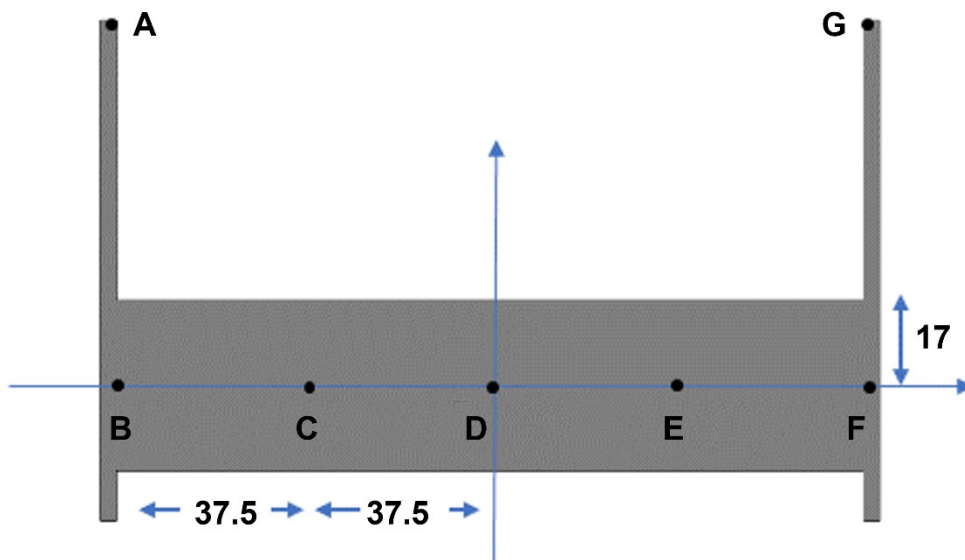

**Fig. S2** Temperature monitoring point distribution.

**Table S1** Physical properties of materials.

|                                                          | graphite electrode | CPCM block |
|----------------------------------------------------------|--------------------|------------|
| specific heat ( $\text{J g}^{-1} \text{K}^{-1}$ )        | 0.71               | 1.45       |
| thermal conductivity ( $\text{W m}^{-1} \text{K}^{-1}$ ) | 121                | 5.2        |

**Table S2** Parameter setting values of each component under simulated working conditions

|                                                          | graphite electrode                                          | potting compound | CPCM block                                                 |
|----------------------------------------------------------|-------------------------------------------------------------|------------------|------------------------------------------------------------|
| specific heat capacity / $\text{J g}^{-1} \text{K}^{-1}$ | 0.71                                                        | 1                | The function of the 6 wt% curve in Figure 2b.              |
| density / $\text{g cm}^3$                                | 1.8                                                         | 1.3              | 1.8                                                        |
| thermal conductivity / $\text{W m}^{-1} \text{K}^{-1}$   | 121                                                         | 0.4              | 5.2                                                        |
| heat generation density / $\text{W m}^{-3}$              | Fig. S3 Graphite electrode heat generation density function | 0                | Fig. S3 Heat generation density function of the CPCM block |

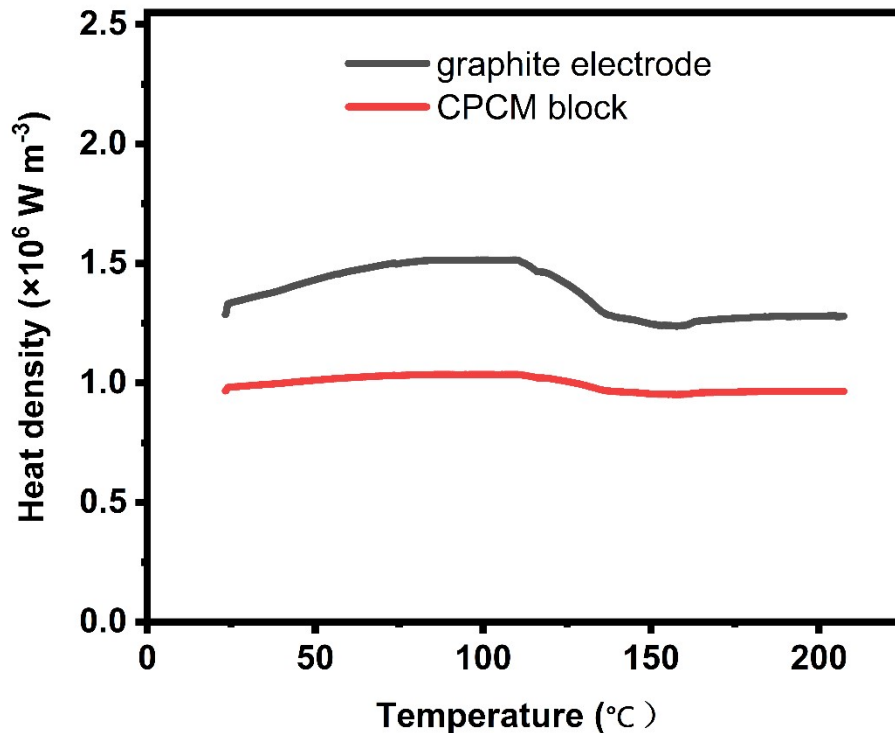**Fig. S3** The heating density curve of graphite electrode and composite PCM

block as a function of temperature.

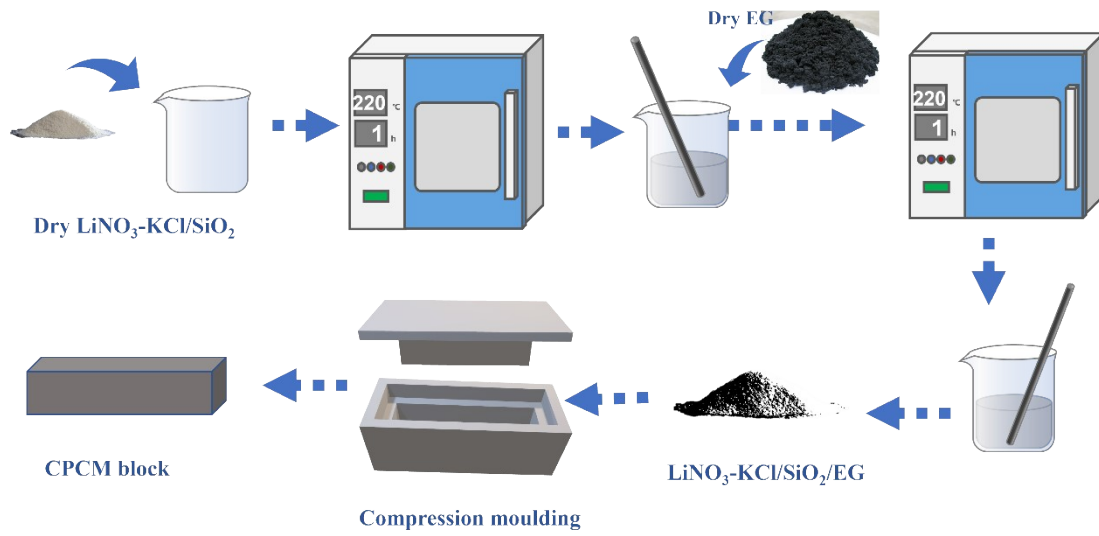

Fig. S4 Composite phase change material preparation process diagram.

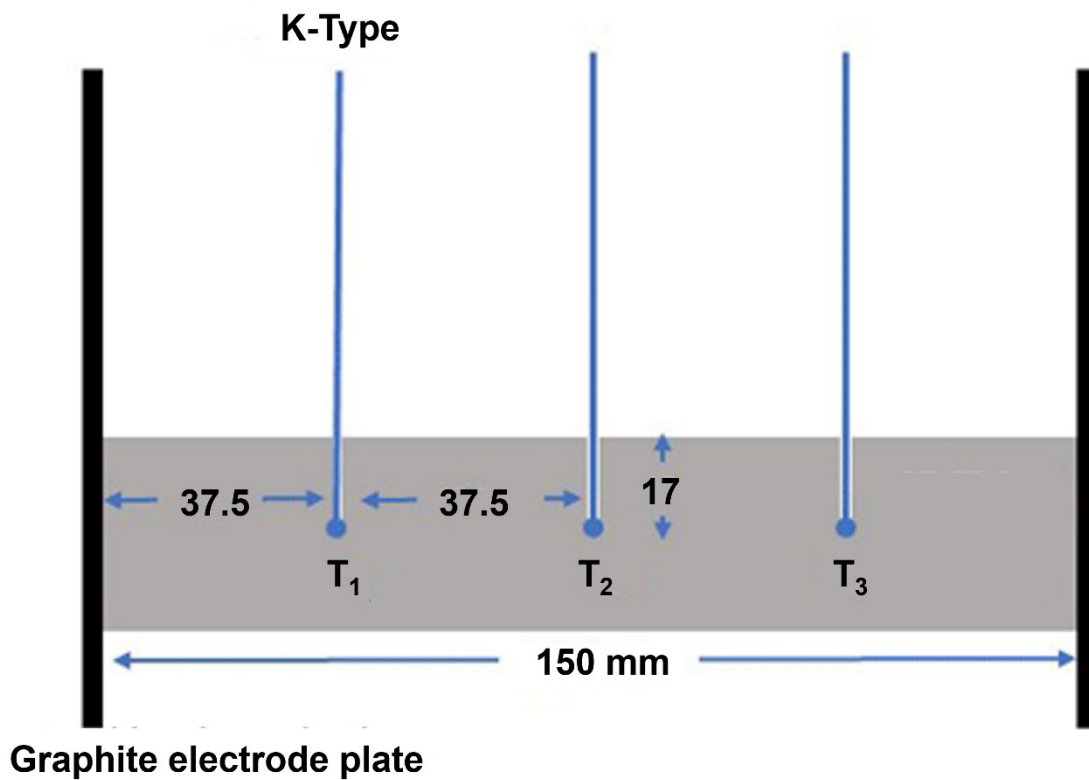

Fig. S5. The distribution of temperature measurement points.

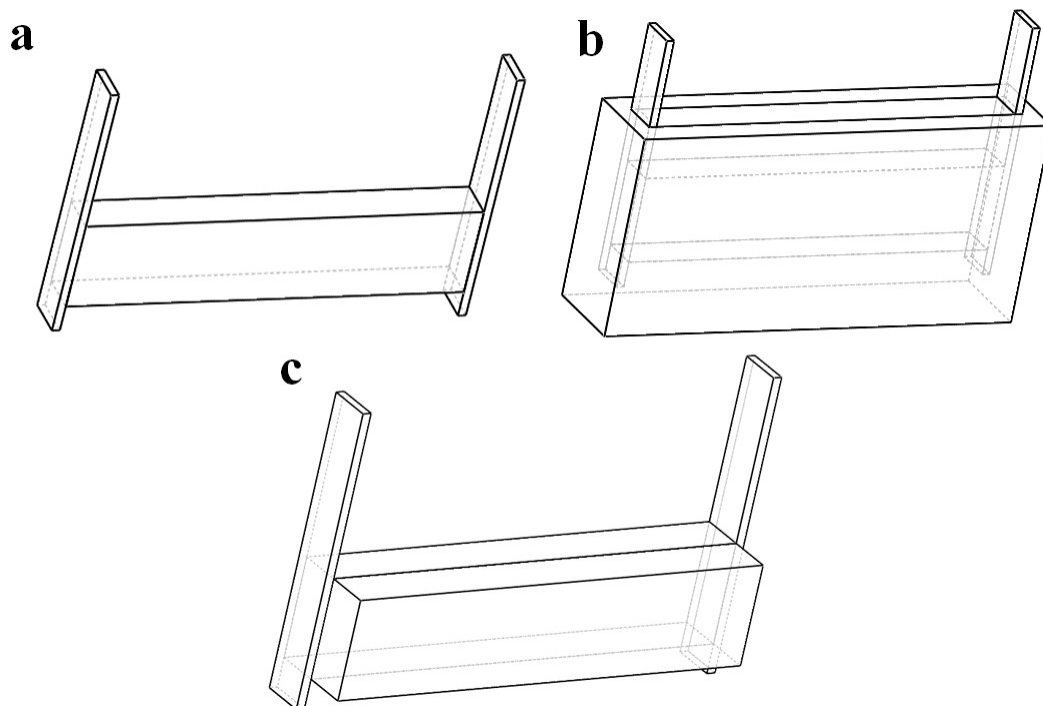

**Fig. S6.** Three-dimensional graphics of EThCM. (a) Before potting; (b) After potting;  
(c) Indirect heating.
