# Supplementary figures and images for: Preparation of inorganic molten salt composite phase change materials and study on their electrothermal conversion properties
Source: Royal Society of Chemistry journal article supplement (doi:10.1039/d4im00009a), 2024-01-01

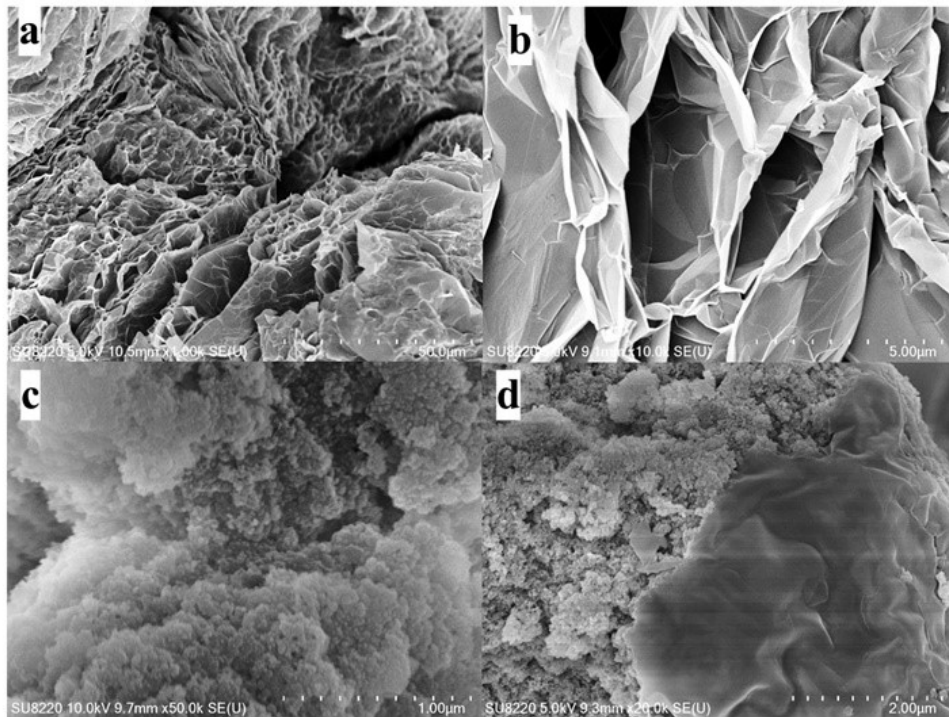

Supplement: d4im00009a1.pdf [file d4im00009a1.pdf]

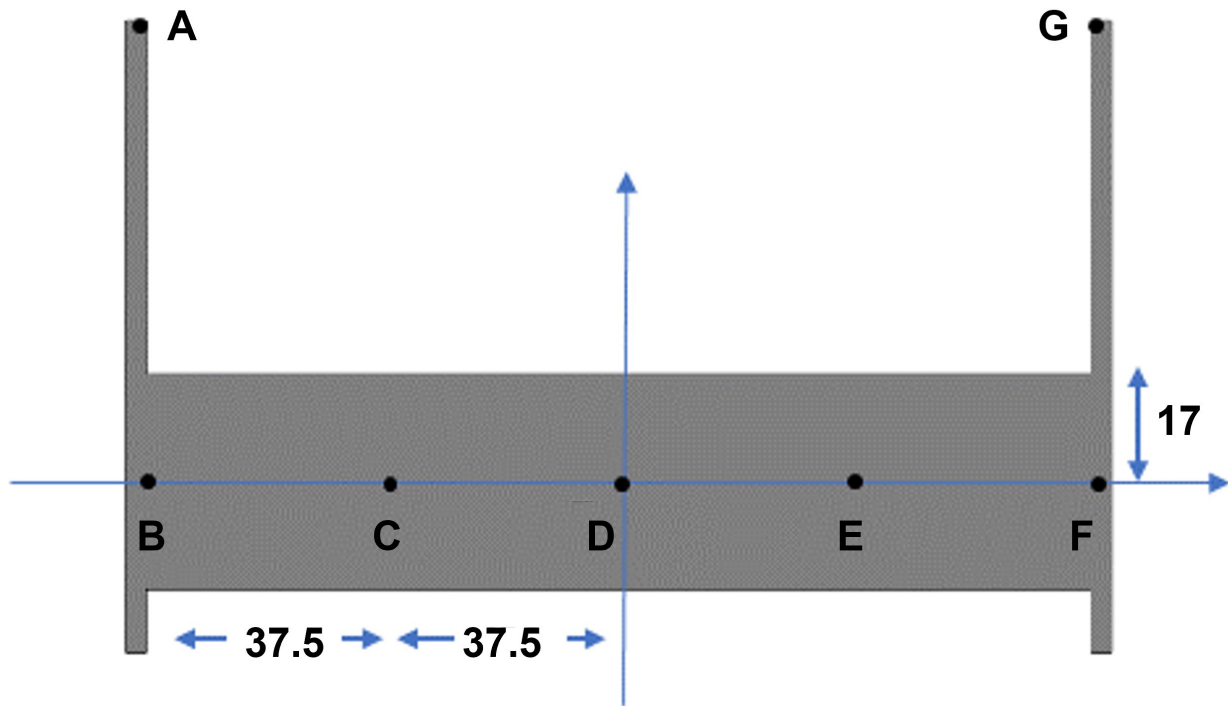

Supplement: d4im00009a2.pdf [file d4im00009a2.pdf]

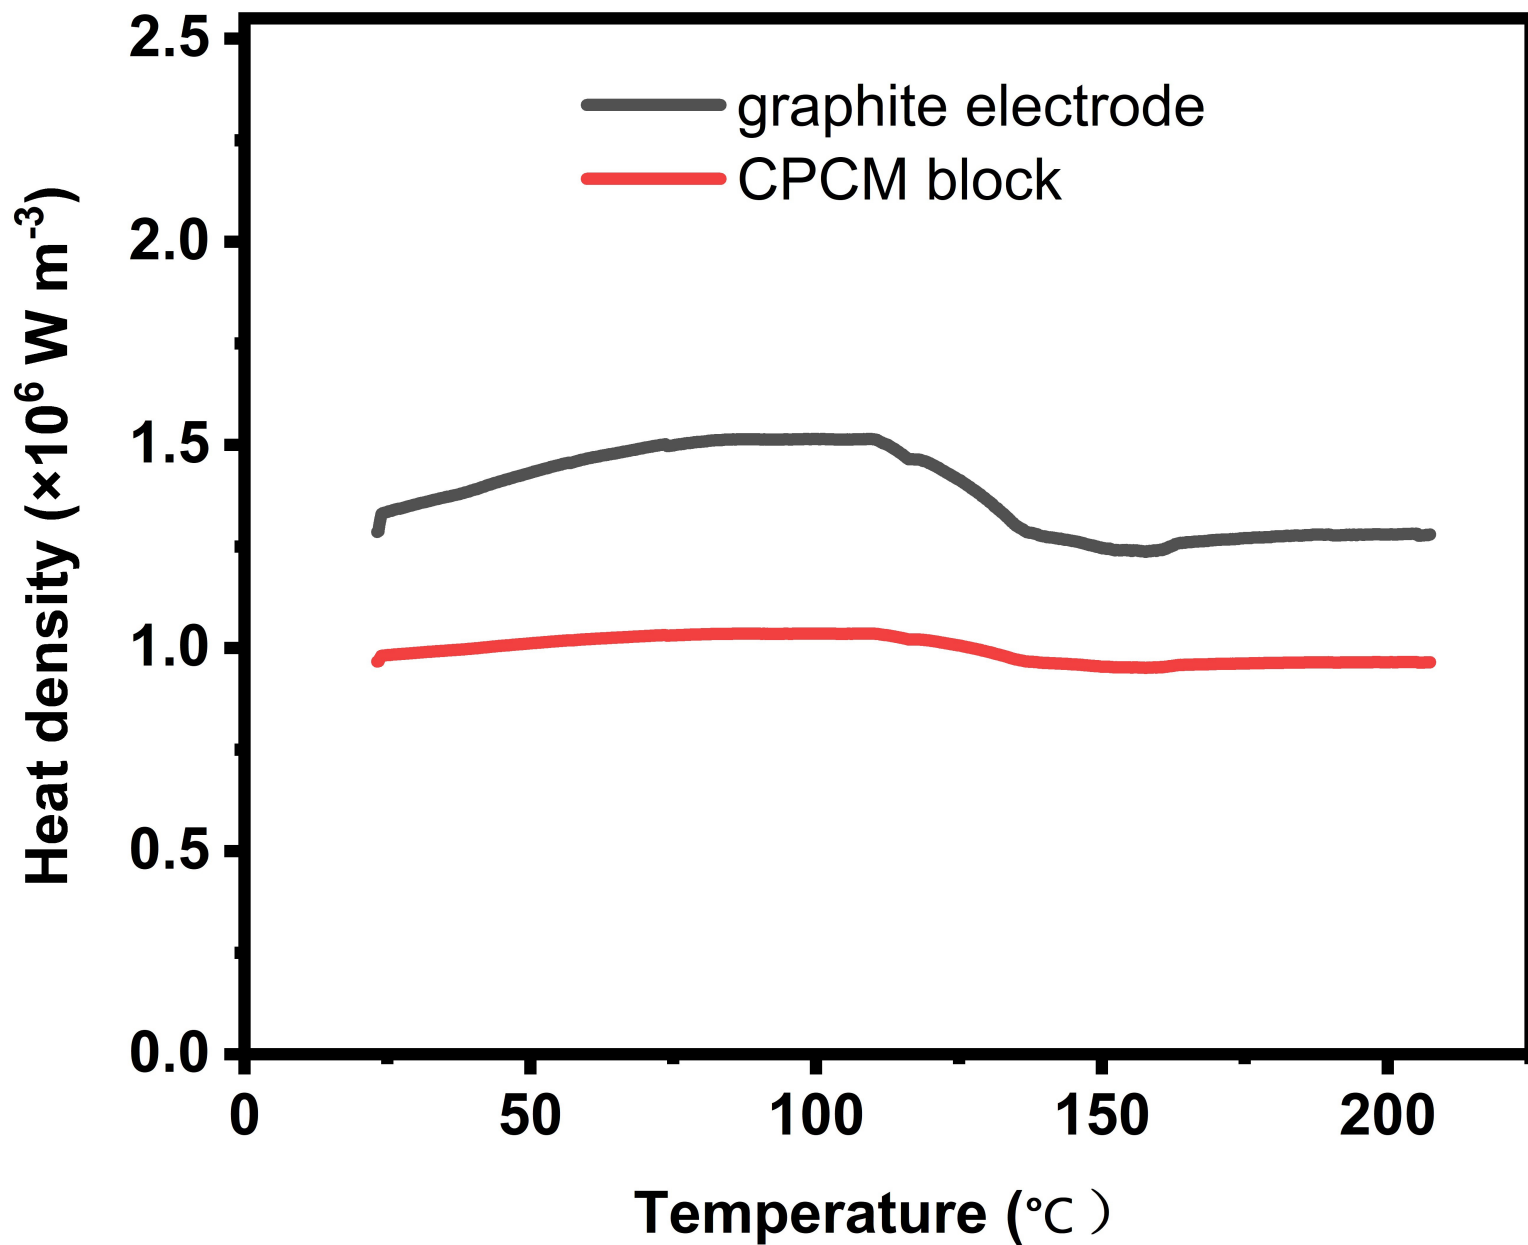

Supplement: d4im00009a3.pdf [file d4im00009a3.pdf]

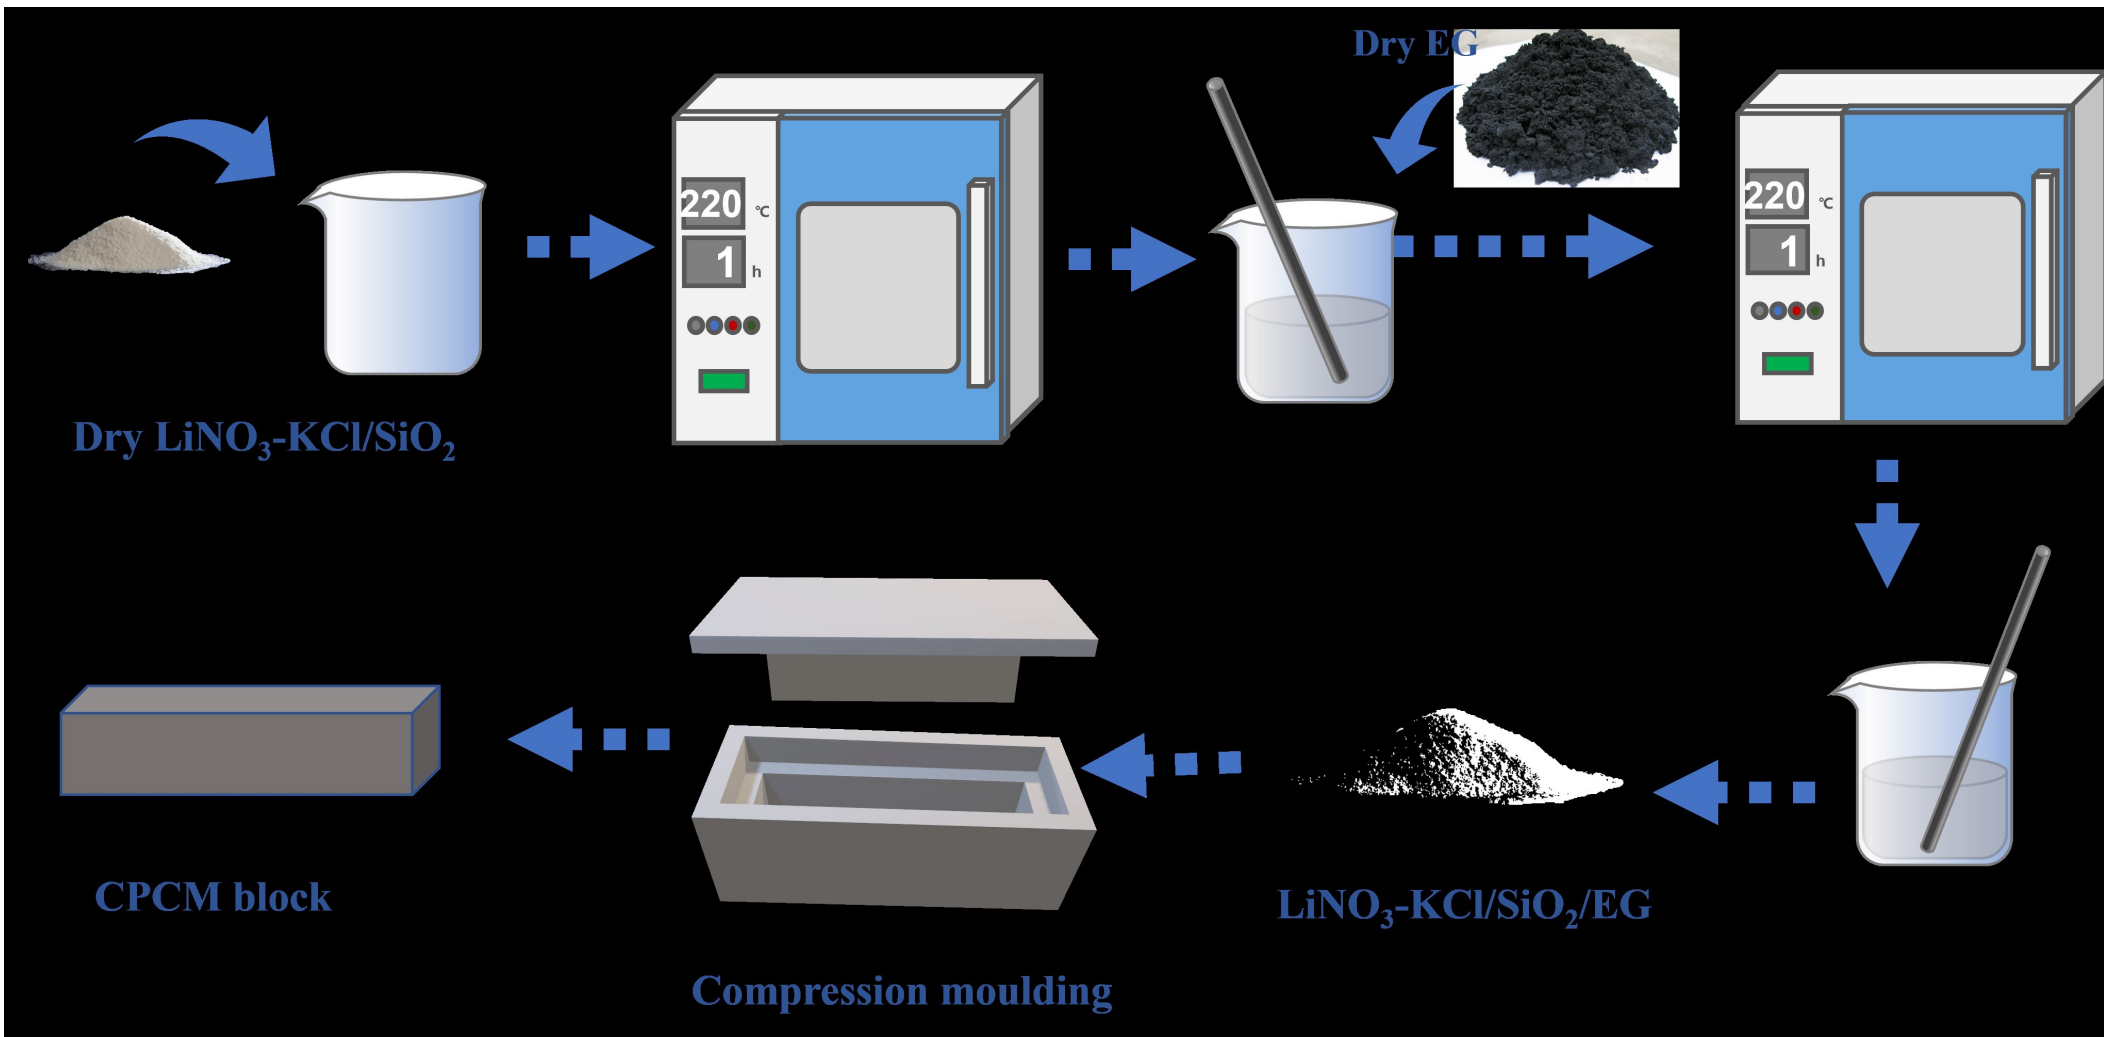

Supplement: d4im00009a4.pdf [file d4im00009a4.pdf]

K-Type

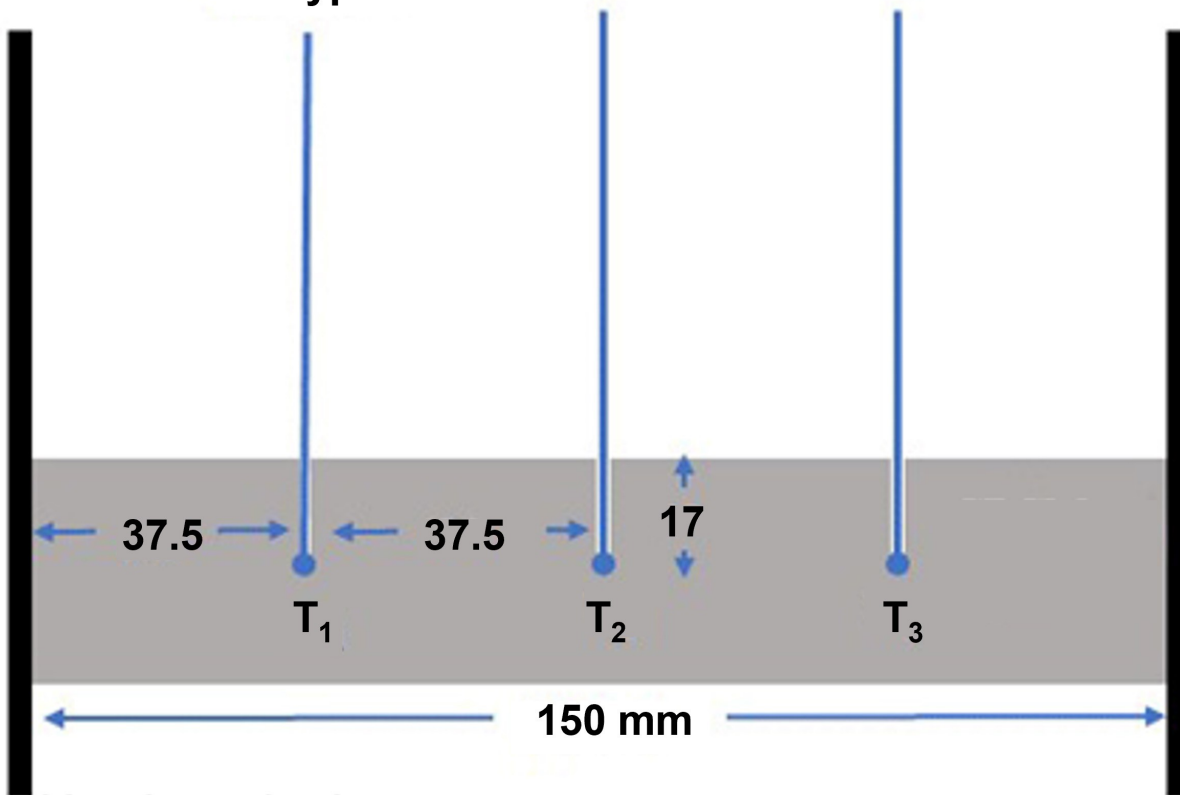

Graphite electrode plate

Supplement: d4im00009a5.pdf [file d4im00009a5.pdf]

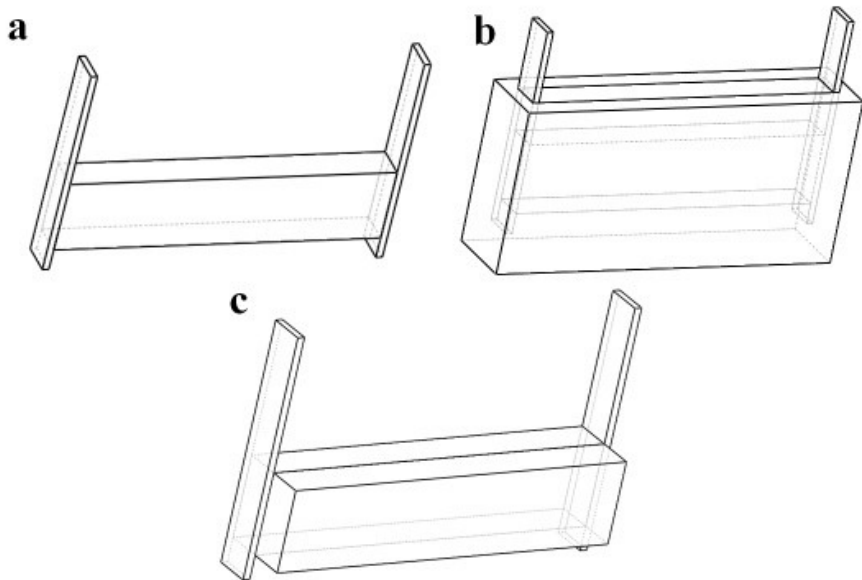

Supplement: d4im00009a6.pdf [file d4im00009a6.pdf]
